# Supplementary material for: The mechanism of Leonuri Herba in improving polycystic ovary syndrome was analyzed based on network pharmacology and molecular docking
Source: PubMed Central journal article supplement (PMC9990637; doi:10.3389/jpps.2023.11234), 2023-02-15
Supplement: Image1.pdf [file Image1.pdf]

### The main parameters of the top 14 targets in the PPI network

| name     | Betweenness | Closeness | Degree | Eigenvector | LAC      | Network  |
|----------|-------------|-----------|--------|-------------|----------|----------|
| FOS      | 0.4         | 0.764706  | 18     | 0.230713    | 15.11111 | 16       |
| JUN      | 4.11746     | 1         | 26     | 0.306928    | 19.38462 | 24.68577 |
| AKT1     | 4.11746     | 1         | 26     | 0.306928    | 19.38462 | 24.68577 |
| MYC      | 1.243651    | 0.8125    | 20     | 0.247962    | 16       | 17.35232 |
| EGFR     | 2.550794    | 0.928571  | 24     | 0.290403    | 18.66667 | 21.67068 |
| HIF1A    | 3.381746    | 0.928571  | 24     | 0.286363    | 18       | 21.20203 |
| HSP90AA1 | 0.2         | 0.722222  | 16     | 0.207754    | 13.5     | 14.4     |
| TP53     | 2.550794    | 0.928571  | 24     | 0.290403    | 18.66667 | 21.67068 |
| TNF      | 2.610317    | 0.928571  | 24     | 0.289761    | 18.66667 | 21.73206 |
| IL6      | 3.298413    | 0.928571  | 24     | 0.286273    | 18       | 21.20203 |
| IL1B     | 0.45        | 0.722222  | 16     | 0.201658    | 13       | 13.86667 |
| MMP9     | 0.5         | 0.764706  | 18     | 0.229264    | 15.11111 | 16.18824 |
| CASP3    | 2.990476    | 0.928571  | 24     | 0.287651    | 18.33333 | 21.50585 |
| MAPK14   | 1.588889    | 0.8125    | 20     | 0.247306    | 15.6     | 16.87513 |

Supplement Figure1 . The main parameters of the top 14 targets in the PPI network.
